# Supplementary material for: CMTM6 significantly relates to PD-L1 and predicts the prognosis of gastric cancer patients
Source: PeerJ. 2020 Aug 17;8:e9536. doi: 10.7717/peerj.9536 (PMC7439957; doi:10.7717/peerj.9536)
Supplement: Supplemental Information 1 — Age (year): 1 = <60，2 = ≥60; Sex: 1 = Male，2 = Female; Histology: 1 = Adenocarcinoma，2 = others; Tumor site: 1 = cardiac, 2 = gastric body, 3 = antrum, 4 = whole stomach; Tumor size (cm): 1= ≤ 3, 2 = 3-6,3 =≥ 6; TNM stage: 1=I，2=II，3=III; Grade: 1=I，2=II，3=III; Survival state: 1 = dead, 2 = alive; PD-L1: PD-L1 expression status；0 = negative, 1 = positive; CMTM6: CMTM6 expression score [file peerj-08-9536-s001.xls]

## Sheet: Sheet1
Age(year)	Sex	Histology	Tumor site	Tumor size(cm)	TNM stage	Grade	Survival state	Date of surgery	Follow-up time	Overall survival	PD-L1	CMTM6
2	1	1	2	1	2	2	0	2002-05-17	2007-10-31	1993	0	0
2	2	1	3	2	2	2	1	2002-01-23	2003-11-08	654	1	1
2	1	1	1	1	1	3	0	2000-12-29	2007-10-31	2497	0	0
2	2	1	3	2	2	3	0	2001-01-09	2007-10-31	655	1	0
1	1	1	1	2	2	2	0	2001-01-13	2007-10-31	2482	0	0
2	2	1	3	1	1	2	0	2001-01-16	2007-10-31	656	0	0
2	1	1	3	1	2	3	1	2001-01-12	2002-10-13	639	1	7
2	1	1	3	1	2	2	0	2001-01-16	2007-10-31	2479	1	1
2	1	1	2	1	1	2	0	2001-01-20	2007-10-31	655	1	0
2	1	1	3	2	2	2	0	2001-02-09	2007-10-31	2455	0	0
1	1	1	2	2	3	3	0	2001-02-20	2007-10-31	656	0	4
2	2	1	3	2	3	3	0	2001-03-09	2007-10-31	2427	1	4
2	1	2	3	2	3	2	1	2001-03-08	2001-09-14	657	1	4
2	1	1	2	2	3	1	0	2001-03-09	2007-10-31	2427	1	0
2	1	1	2	2	3	3	1	2001-04-03	2002-11-18	594	1	4
2	1	1	3	2	3	2	1	2001-03-27	2003-03-01	656	1	0
2	2	1	2	2	2	3	1	2001-03-27	2007-10-31	2409	1	0
2	1	1	1	2	3	1	1	2001-04-19	2002-01-01	657	1	3
2	1	1	4	2	2	3	1	2001-04-06	2002-02-01	301	1	1.5
2	1	1	4	3	2	2	1	2002-06-18	2003-11-30	658	1	6
2	1	1	3	3	3	2	1	2001-12-07	2003-03-01	449	1	0
1	1	1	3	2	3	3	1	2002-06-20	2007-10-31	1959	1	0
2	1	1	3	2	3	2	1	2001-08-15	2001-08-23	657	1	3
1	1	1	3	1	1	2	1	2001-08-14	2007-10-31	2269	0	0
2	1	1	3	2	2	3	1	2001-08-16	2006-06-13	658	1	2
2	1	1	4	3	2	2	1	2001-08-16	2002-04-10	237	1	0
1	1	1	3	2	2	1	0	2001-08-17	2007-10-31	659	1	2
2	1	1	3	2	2	3	1	2001-08-22	2007-10-31	2261	1	0
2	1	1	2	3	1	2	0	2001-08-31	2007-10-31	2252	0	6.5
2	1	1	4	3	2	2	1	2001-08-25	2002-09-20	658	1	3
1	2	1	2	1	1	3	0	2001-08-31	2007-10-31	2252	0	0
2	2	1	3	3	2	2	1	2001-08-31	2001-09-22	659	1	0
1	1	1	2	3	3	1	1	2001-08-30	2007-10-31	2253	1	0
1	1	1	4	3	3	2	0	2001-09-05	2007-10-31	660	0	0
2	1	1	2	3	2	2	0	2001-09-26	2007-10-31	2226	0	0
1	1	1	2	3	2	2	0	2001-10-04	2007-10-31	2218	1	0.5
1	2	1	3	2	1	2	1	2001-10-08	2007-10-31	659	1	0
1	1	1	3	1	1	1	0	2001-10-16	2007-10-31	2206	1	4.5
1	1	1	3	2	1	2	0	2001-10-19	2007-10-31	660	1	2
1	1	1	3	3	1	3	0	2001-10-19	2007-10-31	2203	0	4
2	2	1	3	1	1	2	0	2001-10-23	2007-10-31	661	1	0.5
2	1	1	2	2	1	2	1	2001-10-23	2002-08-17	298	0	1
2	1	1	1	2	2	1	1	2001-11-08	2007-10-31	2183	1	4.5
2	1	1	3	2	2	2	1	2001-11-06	2004-12-01	660	1	1
1	2	1	3	1	3	2	1	2001-11-19	2007-10-31	2172	1	0
2	2	1	3	2	1	2	1	2001-12-12	2007-10-31	661	1	0
1	2	1	2	3	2	2	0	2001-12-06	2007-10-31	2155	0	0
1	1	1	2	1	1	2	0	2001-12-12	2007-10-31	662	0	0
2	1	1	1	2	1	2	1	2001-12-10	2004-08-01	965	1	2
2	2	1	3	3	1	3	1	2001-12-20	2003-09-27	646	1	1.5
2	1	1	3	3	3	2	0	2001-12-25	2007-10-31	661	0	0
2	1	1	1	2	2	2	1	2002-01-04	2003-03-01	421	1	7
2	2	2	3	1	2	2	1	2002-01-07	2007-10-31	662	1	0
2	2	1	2	3	1	2	0	2002-01-15	2007-10-31	2115	1	3
2	2	1	3	3	2	2	1	2002-01-16	2002-09-25	663	1	7
2	1	1	2	2	3	2	1	2002-01-22	2007-10-31	2108	1	4
2	1	2	3	2	1	2	1	2002-01-29	2003-10-28	637	0	1.5
1	1	2	3	2	3	2	1	2002-02-01	2003-08-31	662	0	0
1	2	1	2	2	2	2	1	2002-01-31	2007-10-31	2099	1	0
1	1	1	2	2	2	2	1	2002-02-05	2003-05-13	663	0	1.5
1	1	1	2	2	1	2	1	2002-02-05	2003-09-11	583	1	4
1	2	2	2	3	3	1	1	2002-02-05	2002-06-01	664	1	1.5
2	2	1	3	3	2	3	1	2002-02-07	2007-10-31	2092	1	5
1	1	1	2	3	2	2	1	2002-02-15	2003-10-01	593	1	1
2	2	1	2	2	2	2	0	2002-02-19	2007-10-31	663	0	5
2	2	1	1	2	1	2	1	2002-02-26	2007-10-31	2073	1	3
2	1	1	2	1	1	2	1	2002-02-26	2007-10-31	664	1	2
2	2	1	3	2	2	2	1	2002-02-22	2006-03-04	1471	0	0
2	2	1	2	2	1	2	0	2002-02-21	2007-10-31	665	1	0
1	1	1	3	2	3	2	0	2002-02-26	2007-10-31	2073	1	0
2	1	1	3	2	1	3	1	2002-02-28	2005-04-06	1133	1	0
2	1	1	3	2	2	1	0	2002-03-01	2007-10-31	664	1	7.5
2	2	1	3	2	3	1	0	2002-03-06	2007-10-31	2065	1	2
2	1	1	3	2	3	3	0	2002-03-05	2007-10-31	665	0	0
2	1	2	2	3	2	3	0	2002-03-05	2007-10-31	2066	1	3
2	1	1	3	2	2	3	1	2002-03-05	2004-01-01	666	1	3
2	1	1	2	1	2	2	1	2002-03-08	2007-10-31	2063	0	0
1	1	1	3	2	2	3	1	2002-03-14	2007-10-31	2057	1	4.5
2	1	2	1	2	1	2	1	2002-03-12	2002-04-01	665	1	0.5
2	1	1	2	1	1	2	1	2002-03-15	2005-11-11	1337	0	2
2	1	2	2	3	2	3	0	2002-04-26	2007-10-31	666	0	0
2	1	1	1	2	1	2	1	2002-04-23	2003-04-06	348	1	3
1	1	1	3	2	3	3	1	2002-05-07	2003-11-12	667	1	1
1	2	1	2	1	3	3	1	2002-04-30	2003-12-31	610	1	1.5
1	1	1	3	2	2	3	1	2002-04-30	2003-12-01	580	0	2
1	1	1	3	2	2	1	0	2002-04-30	2007-10-31	666	1	1
2	1	1	3	2	1	2	1	2002-05-07	2002-09-15	131	1	4
1	1	1	3	1	1	3	1	2002-05-16	2007-10-31	667	0	1.5
1	2	1	3	2	3	3	1	2002-05-16	2002-09-22	129	1	0
1	1	1	2	1	1	2	0	2002-05-20	2007-10-31	668	1	0
1	2	2	3	2	2	1	0	2002-05-23	2007-10-31	1987	1	0
1	1	1	3	2	1	2	1	2002-05-23	2005-02-05	989	0	3
2	1	1	2	2	3	3	1	2002-05-24	2003-05-09	667	1	0
1	1	1	2	1	2	2	1	2002-05-24	2007-10-31	1986	1	4.5
1	1	1	3	1	2	2	0	2002-05-29	2007-10-31	668	1	6
2	2	1	3	1	2	2	0	2002-05-31	2007-10-31	1979	0	0
2	1	2	3	2	3	2	1	2002-06-04	2002-08-26	669	1	9
2	2	1	2	2	1	2	1	2002-06-04	2007-10-31	1975	1	0
1	2	1	3	2	1	3	1	2002-06-07	2007-10-31	1972	0	3
1	1	1	4	3	1	3	0	2002-06-10	2007-10-31	668	1	0
1	1	1	2	2	3	3	0	2002-06-07	2007-10-31	1972	1	1.5
2	1	1	2	2	2	2	1	2002-06-06	2007-10-31	669	1	4
2	1	1	4	2	3	3	0	2002-06-14	2007-10-31	1965	1	0
1	2	1	2	1	1	3	0	2002-06-11	2007-10-31	670	0	1.5
1	1	1	3	1	2	2	0	2002-06-13	2007-10-31	1966	1	0
1	1	1	2	3	1	3	1	2002-06-13	2002-08-19	67	1	5
2	1	1	4	2	2	2	0	2002-06-14	2007-10-31	669	1	0
1	1	2	4	3	3	3	1	2002-06-20	2007-10-31	1959	1	1
2	1	1	2	2	3	2	0	2002-06-18	2007-10-31	670	0	0
1	2	2	2	3	3	2	1	2002-06-13	2004-01-27	593	1	1.5
1	1	2	3	1	2	2	1	2002-06-18	2007-10-31	671	0	0
2	1	1	3	2	1	3	1	2002-06-18	2007-10-31	1961	0	0
1	1	1	2	2	2	3	1	2002-06-19	2007-10-31	1960	0	0
1	1	1	2	1	1	1	1	2002-06-21	2007-10-31	670	1	2
1	1	1	1	2	1	3	1	2002-07-09	2007-10-31	1940	1	2
1	1	2	2	3	3	3	0	2002-07-05	2007-10-31	671	1	4.5
1	1	1	2	2	1	2	1	2002-08-15	2003-03-04	201	1	1.5
1	1	1	3	2	3	3	0	2002-08-16	2007-10-31	672	1	0
1	1	1	3	2	1	3	0	2002-10-04	2007-10-31	1853	1	0
1	1	1	3	2	1	3	1	2002-10-10	2007-10-31	1847	1	0
2	1	1	3	3	2	2	0	2002-10-10	2007-10-31	671	1	1
2	2	2	3	3	1	3	0	2001-11-22	2007-10-31	2169	1	0
1=＜60，2=≥60	1=Male，2=Female	1=Adenocarcinoma，2=others	1 = cardiac, 2 = gastric body, 3 = antrum, 4 = whole stomach	1=≤3,2=3-6,3=≥6	1=I，2=II，3=III	1=I，2=II，3=III	1 = dead, 2 = alive		Follow-up to October 31, 2007		PD-L1 expression status；0 = negative, 1 = positive	CMTM6 expression status
